# Supplementary material for: Stereoselective Luche Reduction of Deoxynivalenol and Three of Its Acetylated Derivatives at C8
Source: PubMed Central journal article supplement (PMC3920264; doi:10.3390/toxins6010325), 2014-01-10
Supplement: toxins-06-00325-s001.pdf [file toxins-06-00325-s001.pdf]

# Supplementary Information

## 1. NMR Spectra

### 1.1. Deoxynivalenol and Derivatives

Figure S1.  $^1\text{H}$  (200 MHz,  $\text{CDCl}_3$ ) of 3-ADON (1).

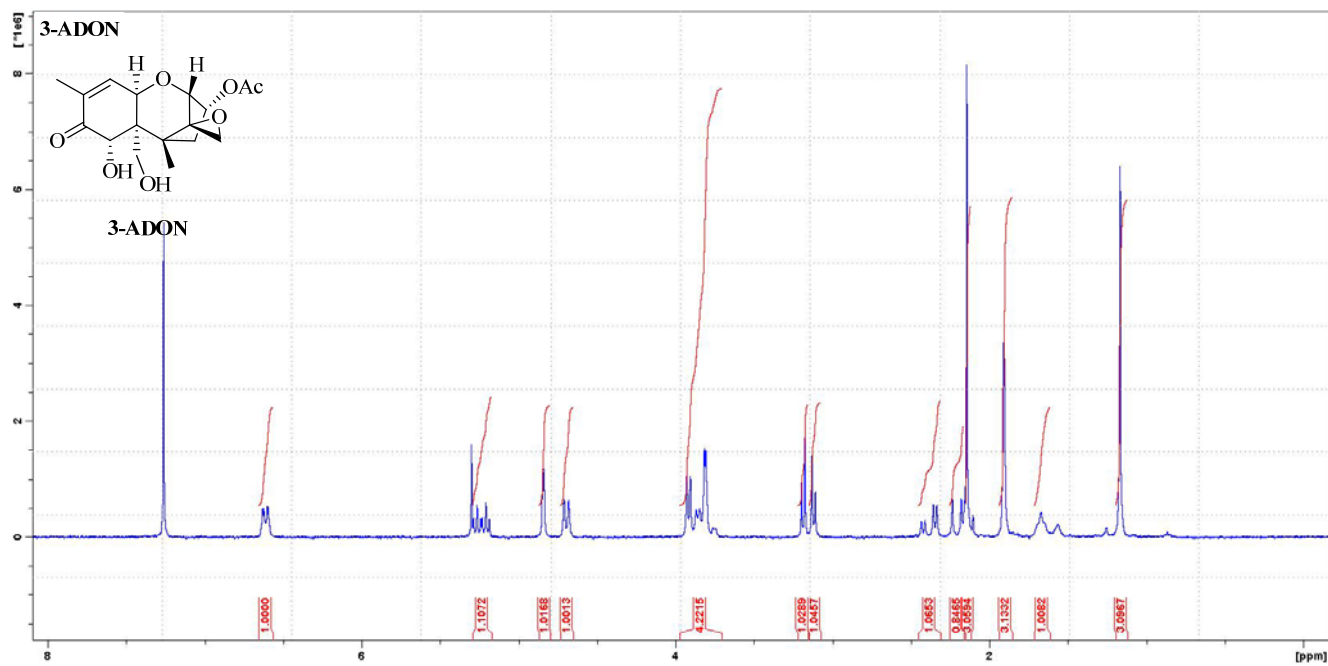

Figure S2.  $^1\text{H}$  (200 MHz,  $\text{CDCl}_3$ ) of 15-ADON (3).

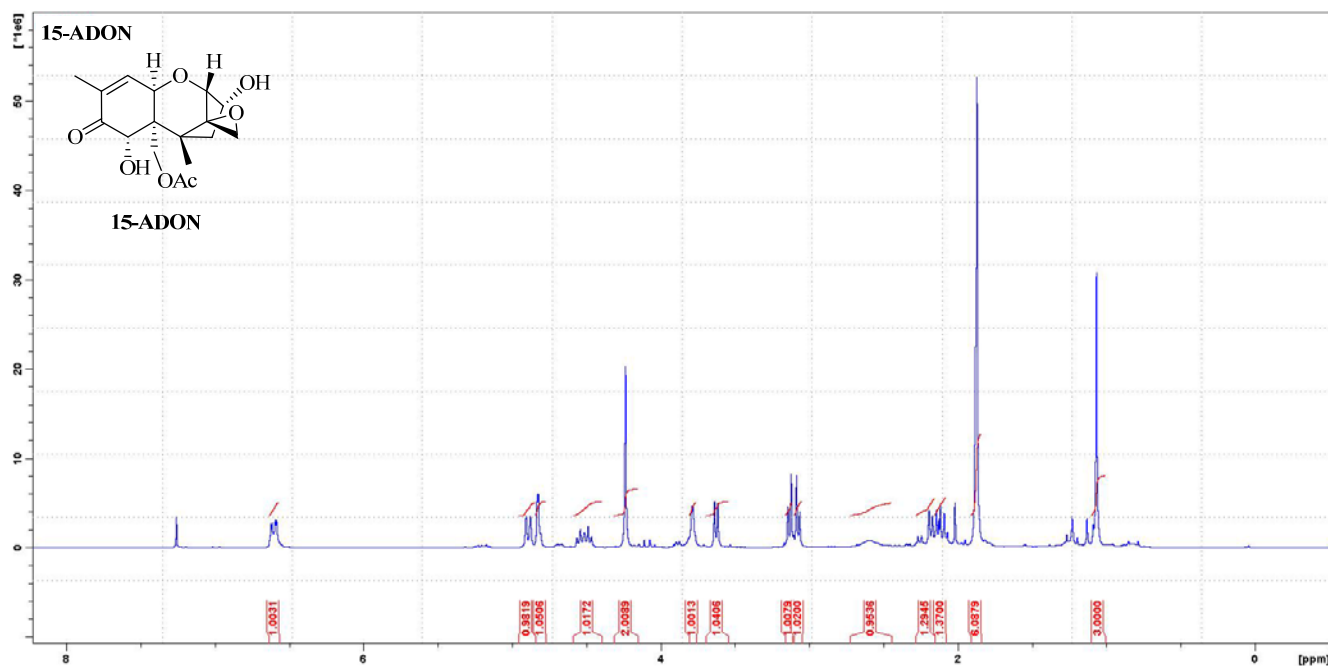

Figure S3.  $^{13}\text{C}$  (50 MHz,  $\text{CDCl}_3$ ) of 15-ADON (3).

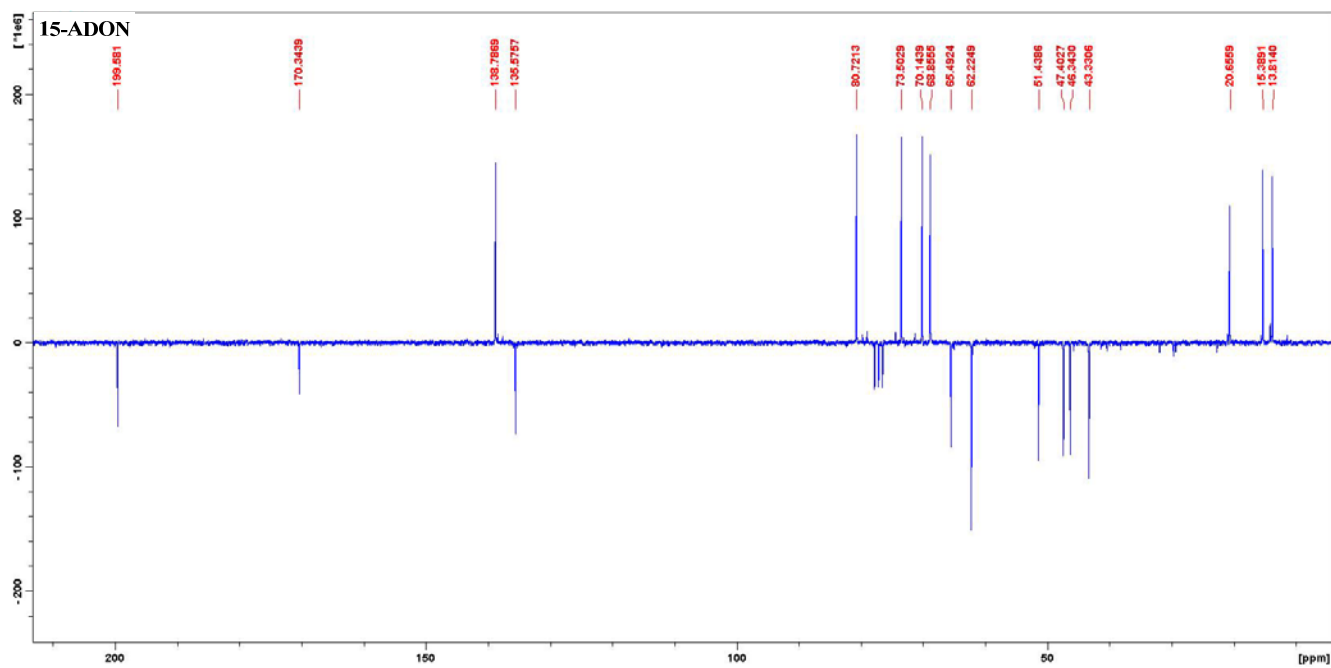

Figure S4.  $^1\text{H}$  (200 MHz,  $\text{CDCl}_3$ ) of 3,15-diADON (4).

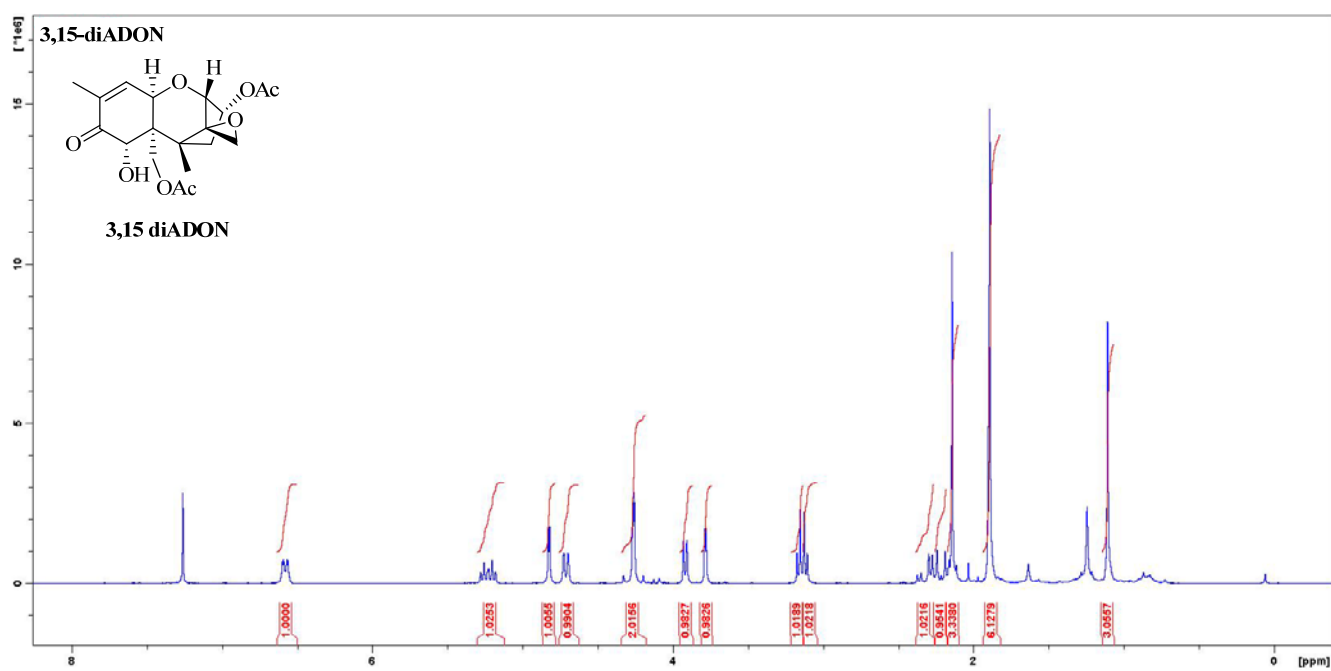

Figure S5.  $^{13}\text{C}$  (50 MHz,  $\text{CDCl}_3$ ) of 3,15-diADON (**4**).

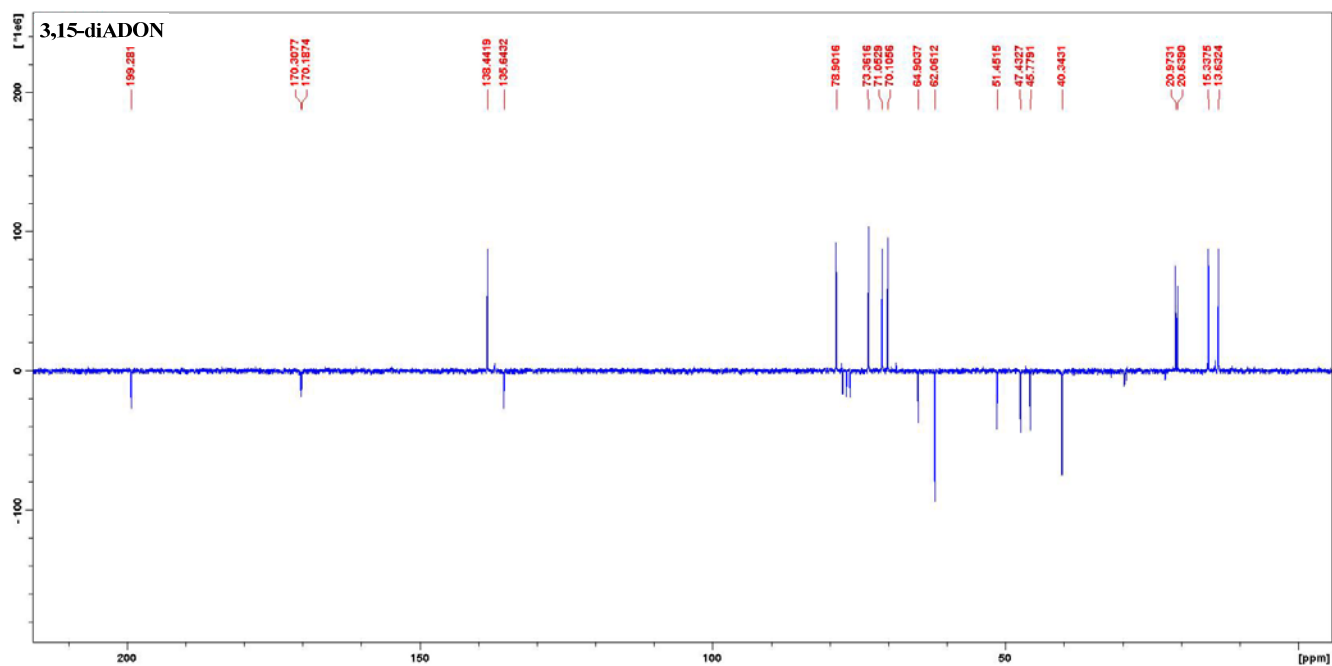

## 1.2. Screening Product

Figure S6.  $^1\text{H}$  (200 MHz,  $\text{CDCl}_3$ ) of (+)-*cis*-carveole (**11**).

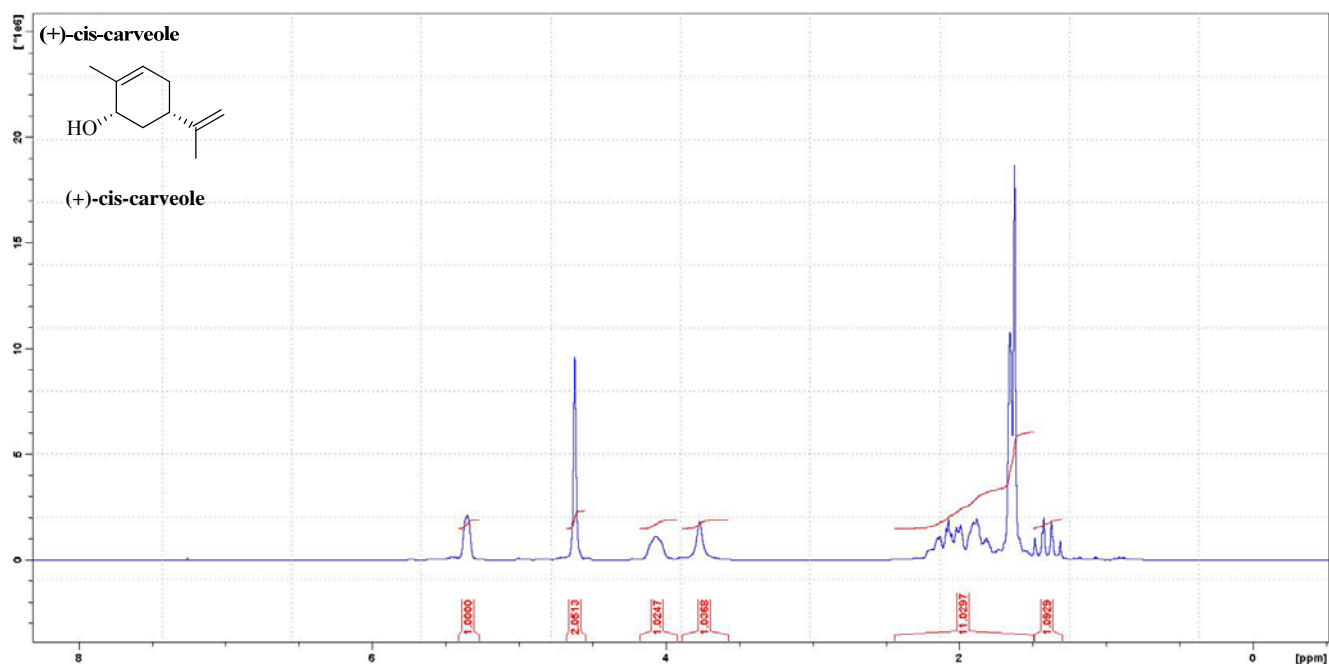

**Figure S7.**  $^{13}\text{C}$  (50 MHz,  $\text{CDCl}_3$ ) of (+)-*cis*-carveole (**11**).

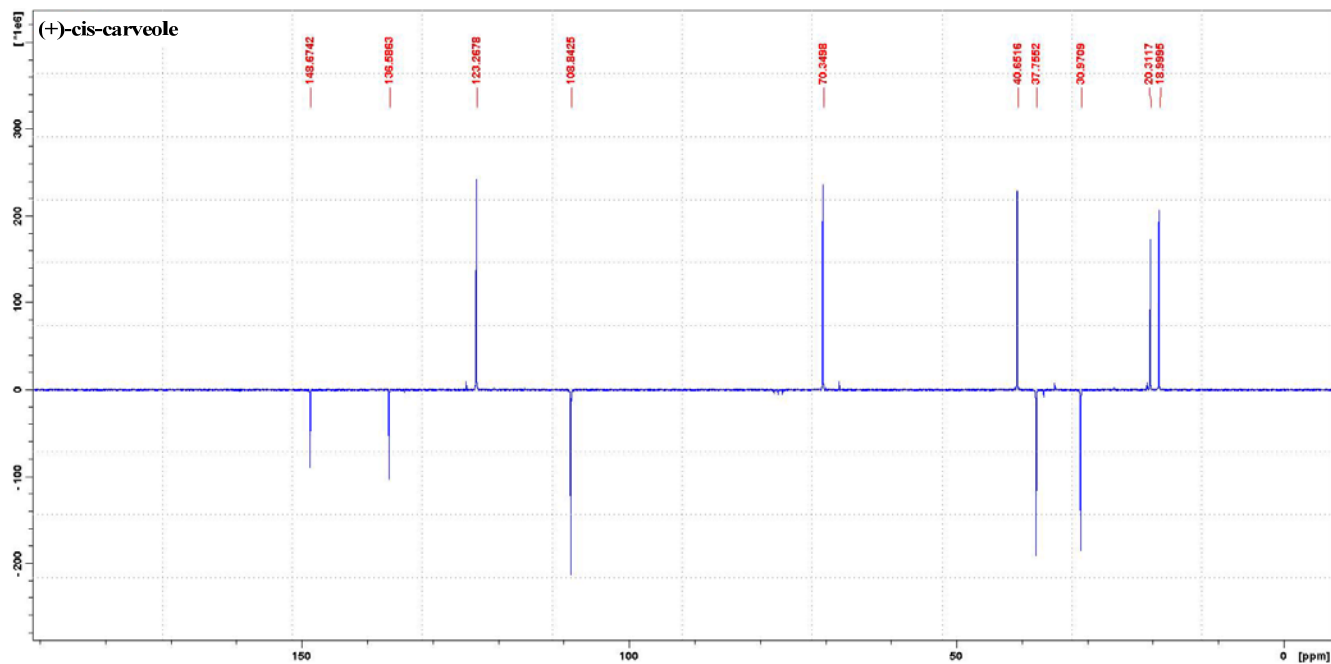

### 1.2. 7,8-Dihydroxycalonectrin and its Derivatives

**Figure S8.**  $^1\text{H}$  (400 MHz, methanol- $d_4$ ) of 3,7,8,15-tetrahydroxyscirpene (**5**).

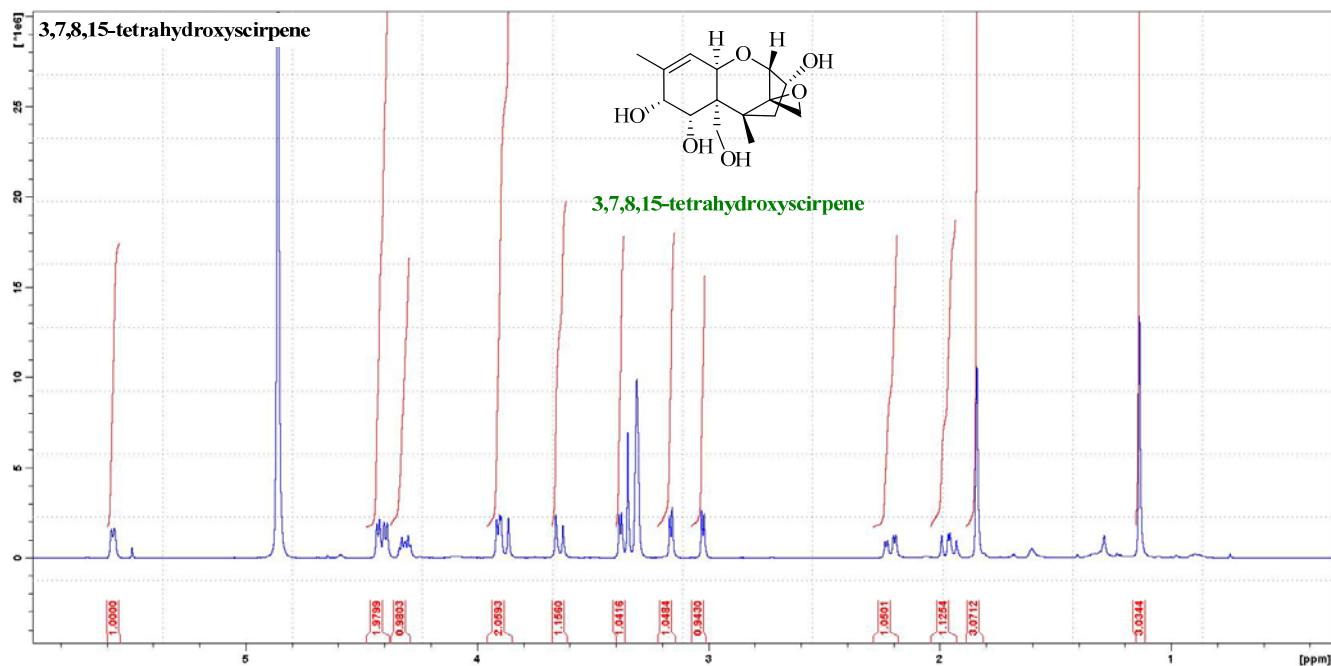

**Figure S9.**  $^{13}\text{C}$  (100 MHz, methanol- $d_4$ ) of 3,7,8,15-tetrahydroxyscirpene (**5**).

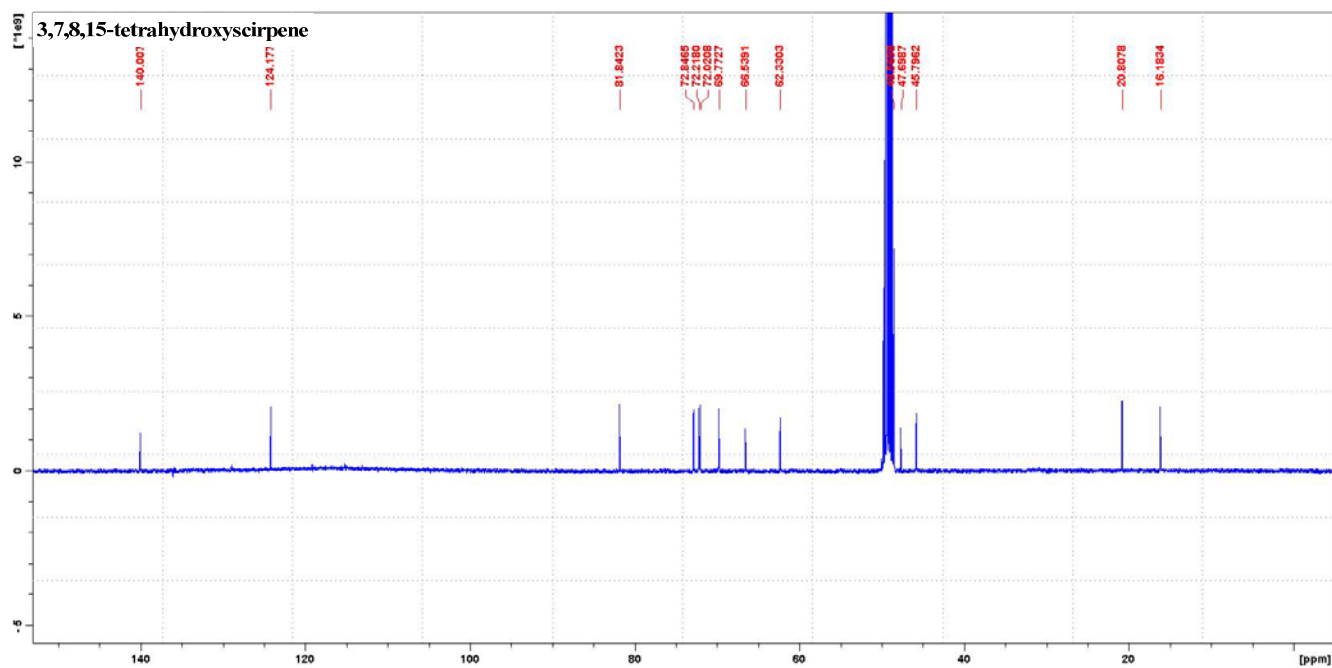

**Figure S10.** COSY (400 MHz, methanol- $d_4$ ) of 3,7,8,15-tetrahydroxyscirpene (**5**).

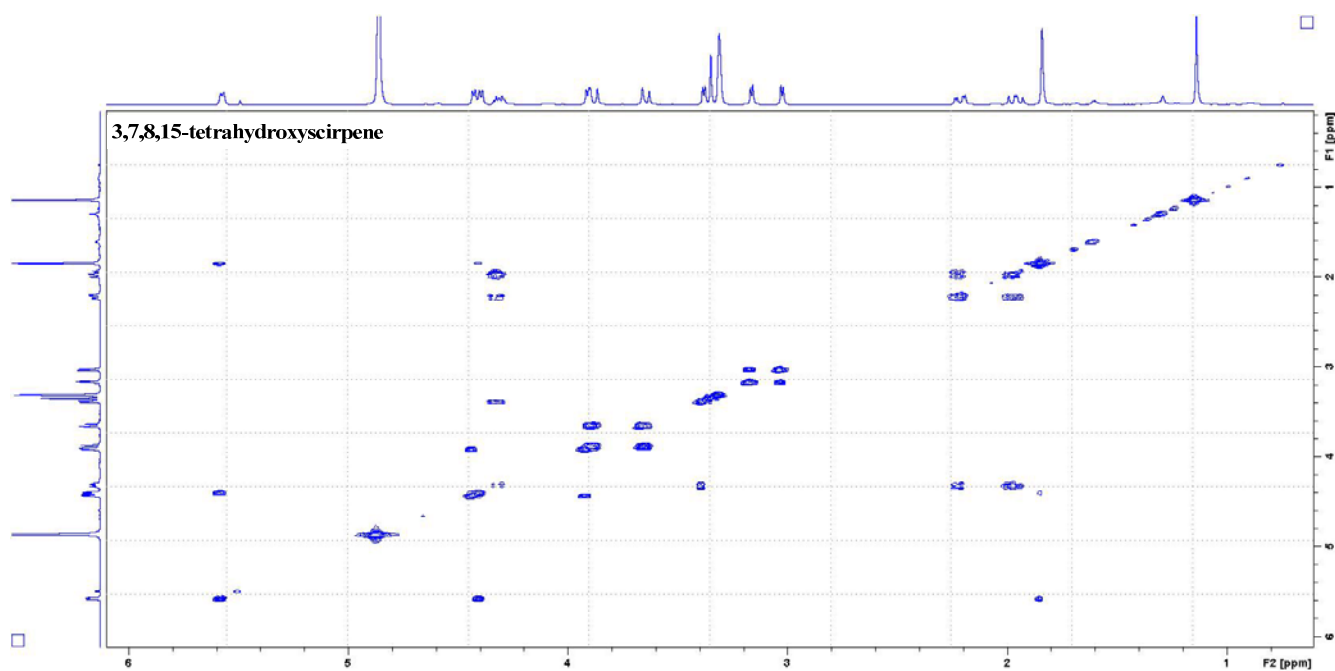

**Figure S11.** HSQC (400 MHz, methanol- $d_4$ ) of 3,7,8,15-tetrahydroxyscirpene (**5**).

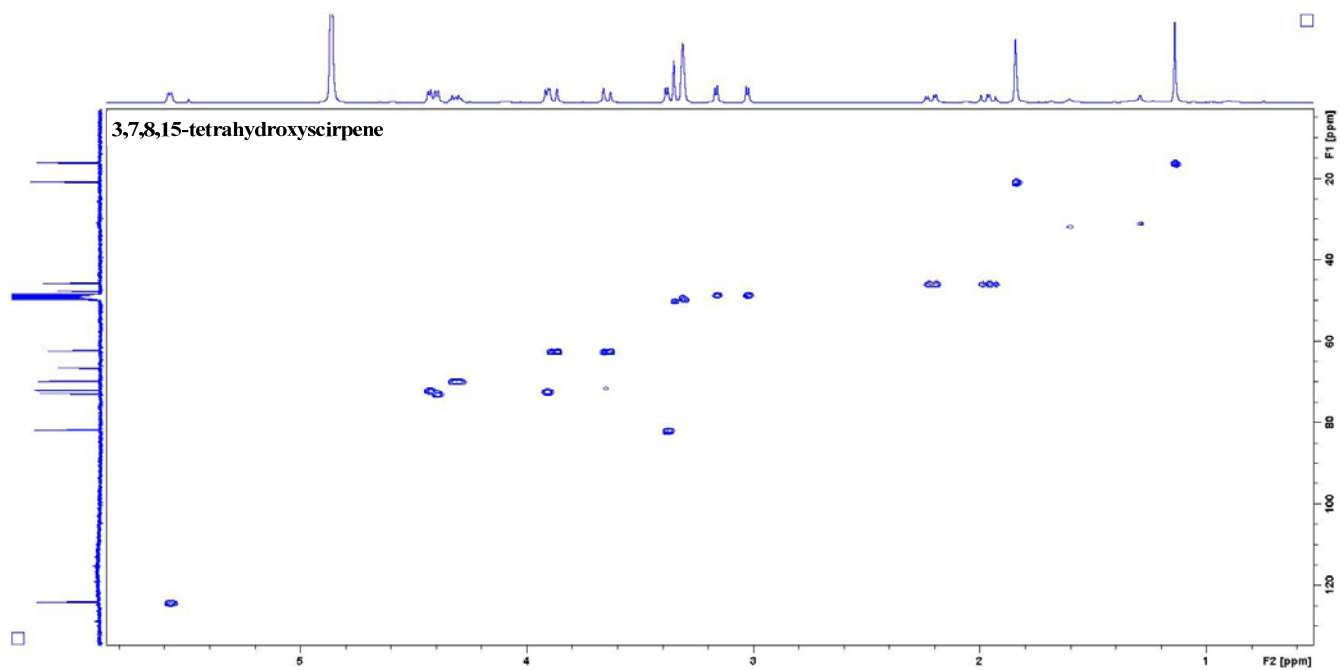

**Figure S12.** HMBC (400 MHz, methanol- $d_4$ ) of 3,7,8,15-tetrahydroxyscirpene (**5**).

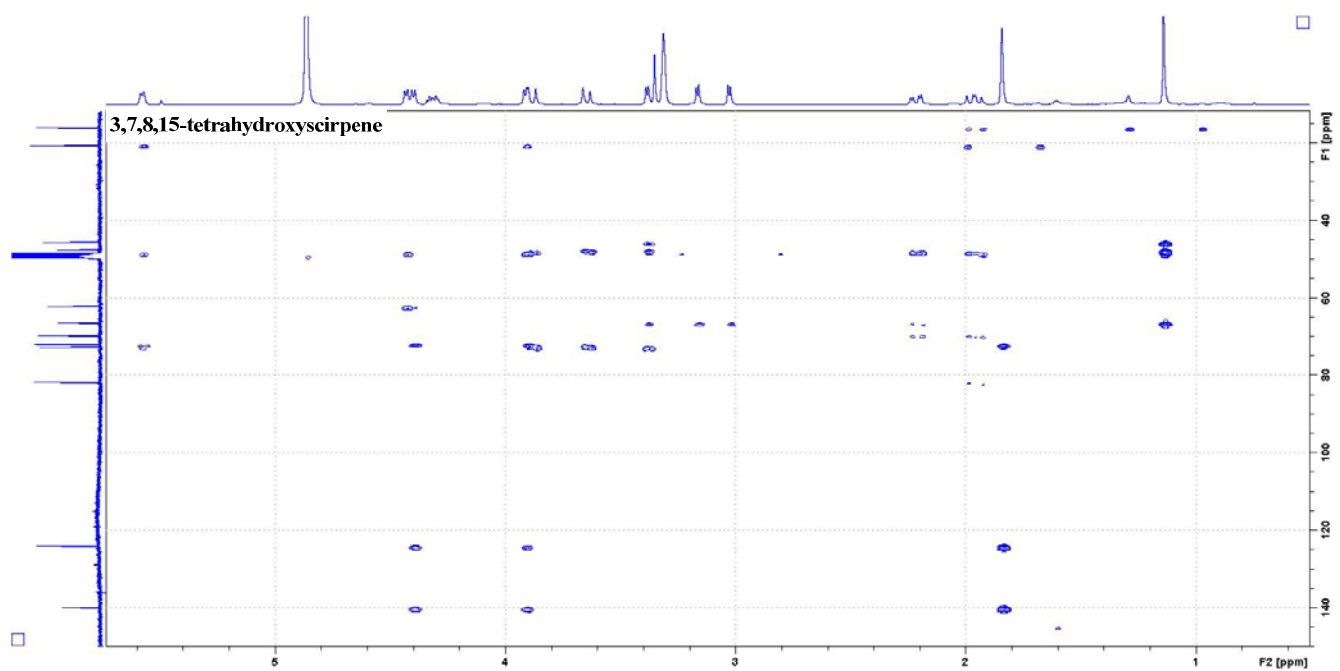

**Figure S13.**  $^1\text{H}$  (400 MHz, methanol- $d_4$ ) of 15-deacetyl-7,8-dihydroxycalonectrin (**7**).

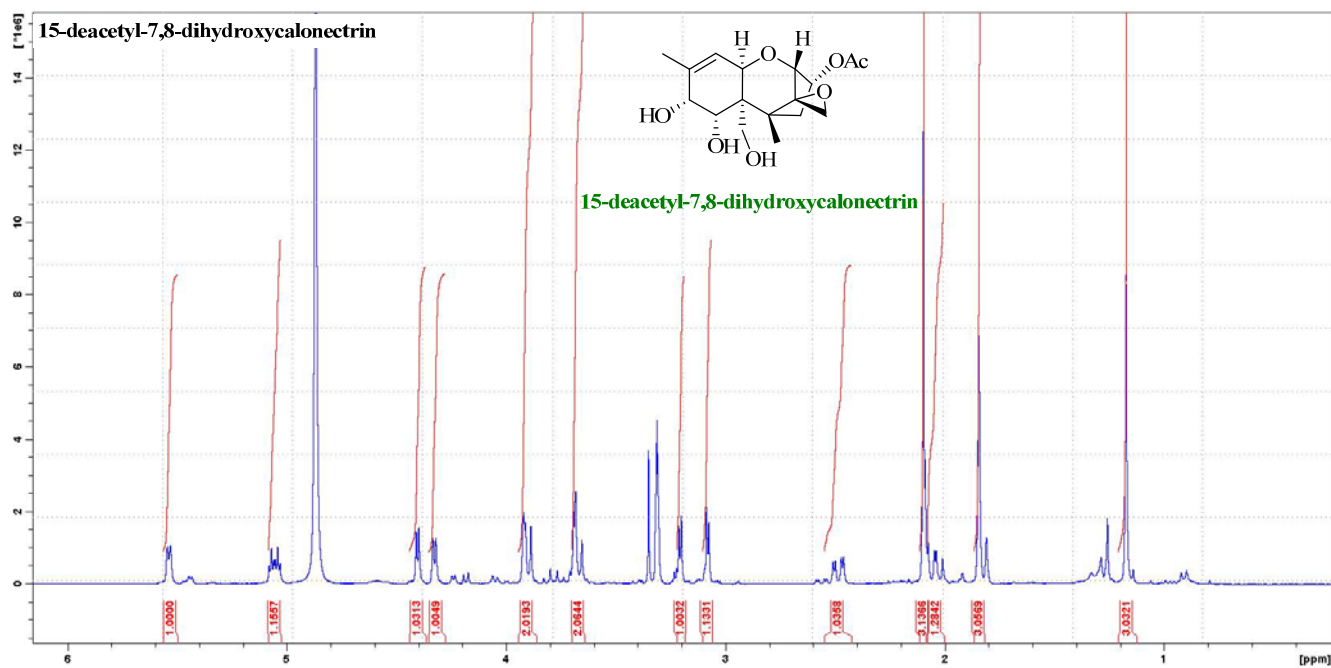

**Figure S14.**  $^{13}\text{C}$  (100 MHz, methanol- $d_4$ ) of 15-deacetyl-7,8-dihydroxycalonectrin (**7**).

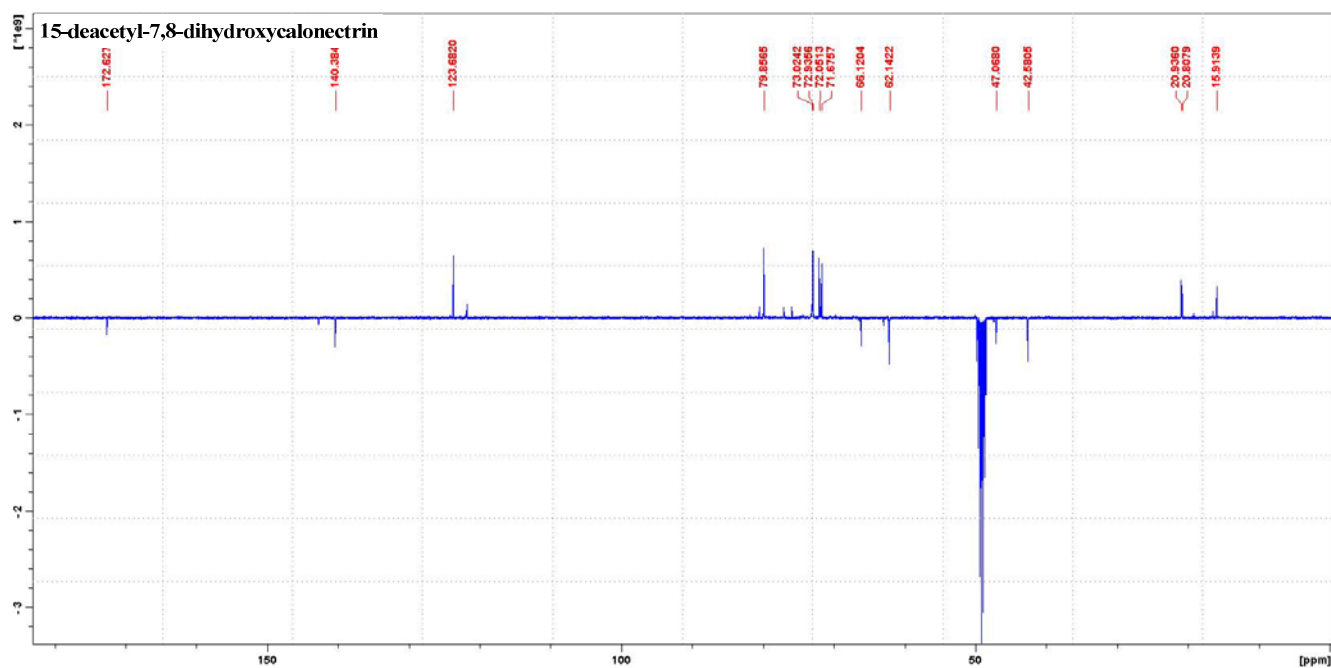

**Figure S15.** COSY (400 MHz, methanol- $d_4$ ) of 15-deacetyl-7,8-dihydroxycalonectrin (**7**).

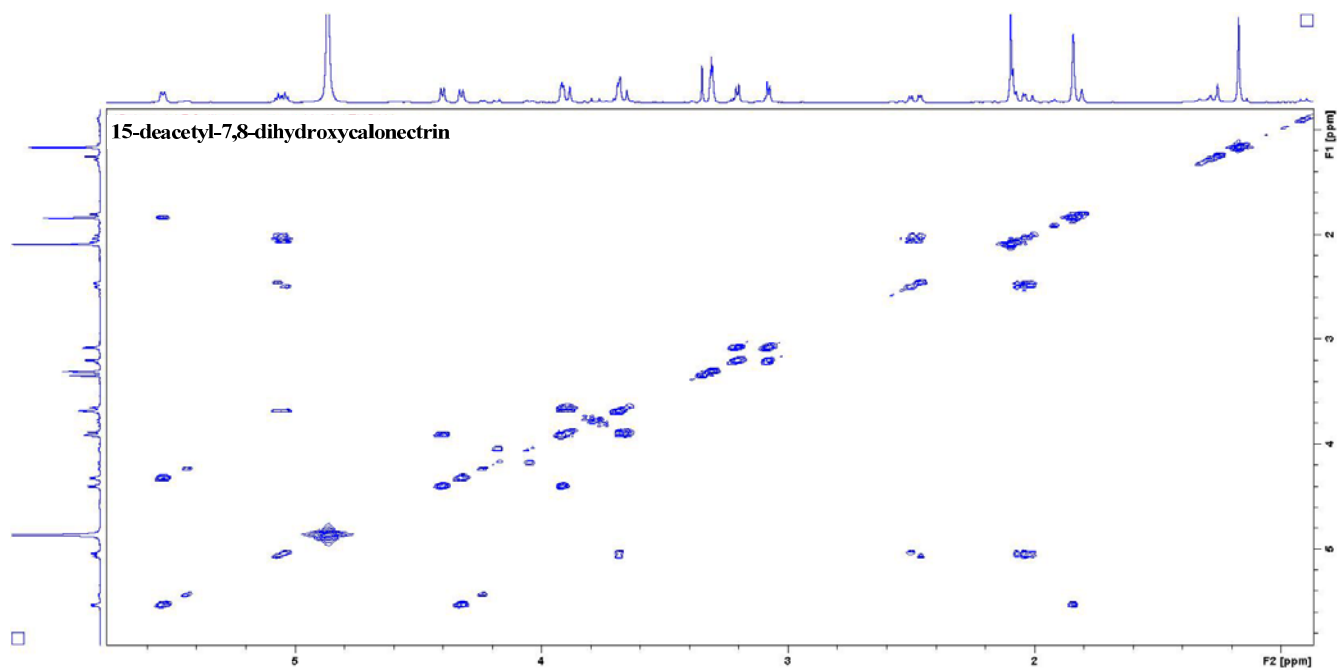

**Figure S16.** HSQC (400 MHz, methanol- $d_4$ ) of 15-deacetyl-7,8-dihydroxycalonectrin (**7**).

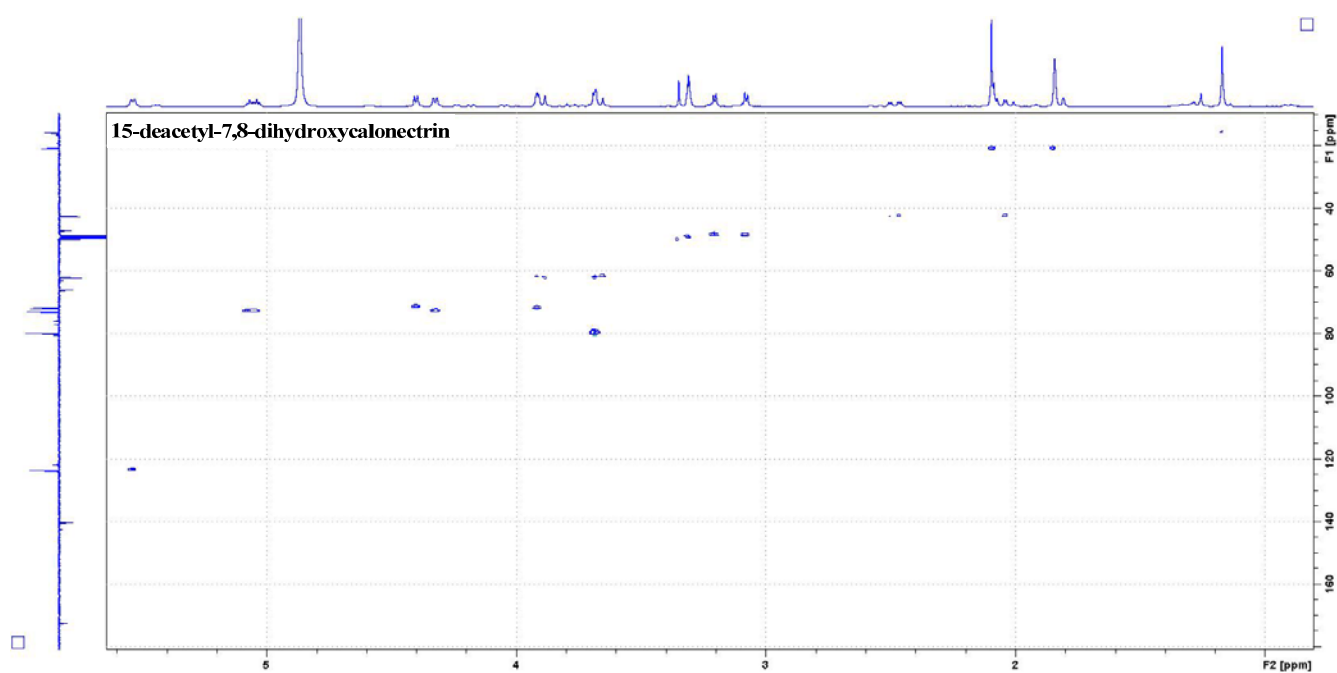



**Figure S17.** HMBC (400 MHz, methanol-*d*<sub>4</sub>) of 15-deacetyl-7,8-dihydroxycalonectrin (**7**).

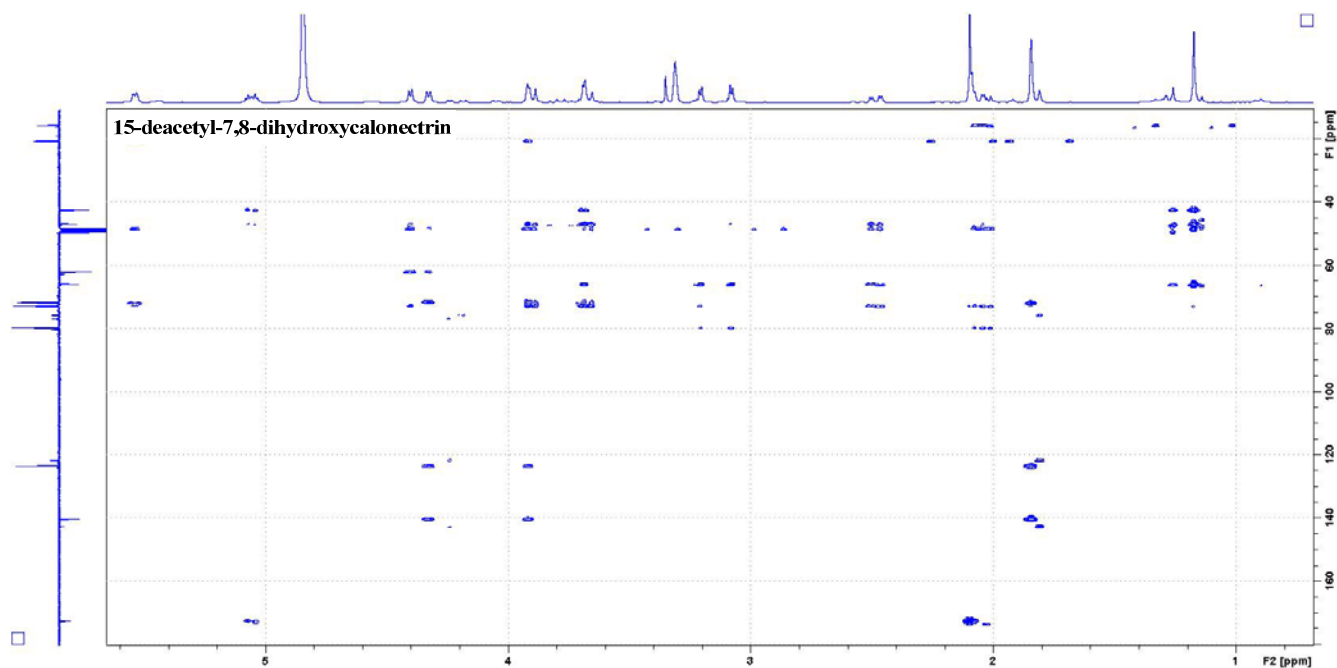

**Figure S18.** <sup>1</sup>H (400 MHz, methanol-*d*<sub>4</sub>) of 3-deacetyl-7,8-dihydroxycalonectrin (**8**).

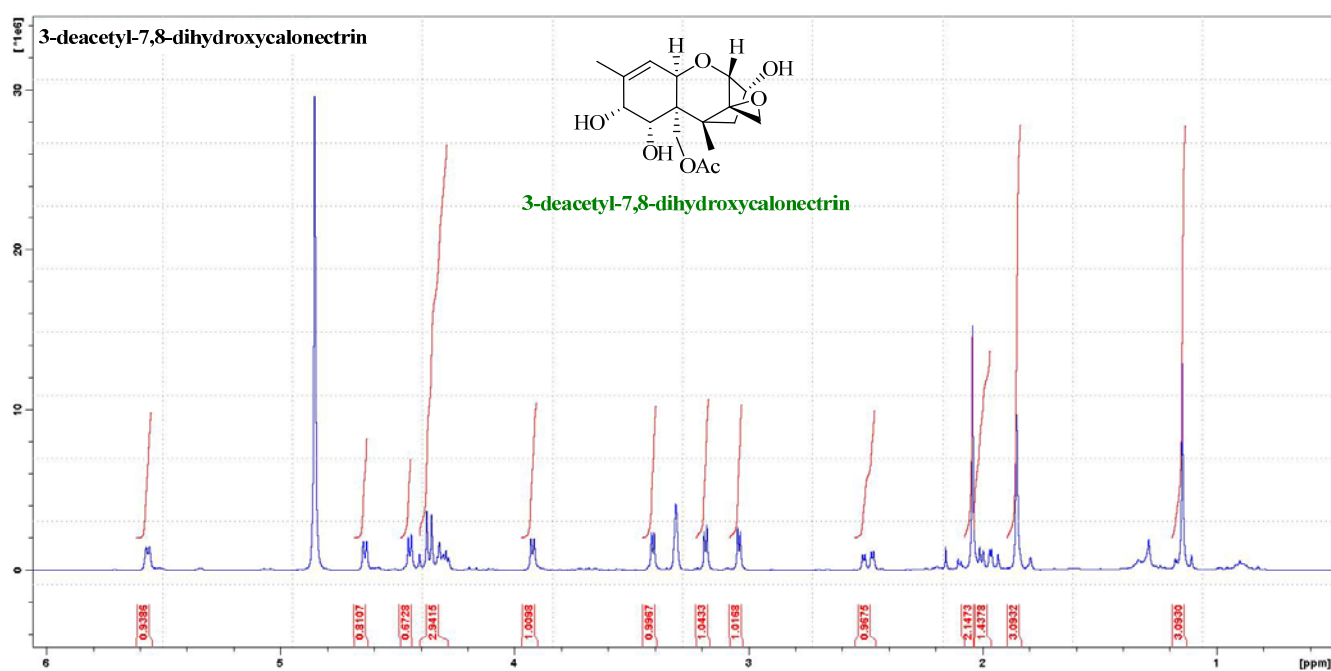

**Figure S19.**  $^{13}\text{C}$  (100 MHz, methanol- $d_4$ ) of 3-deacetyl-7,8-dihydroxycalonectrin (**8**).

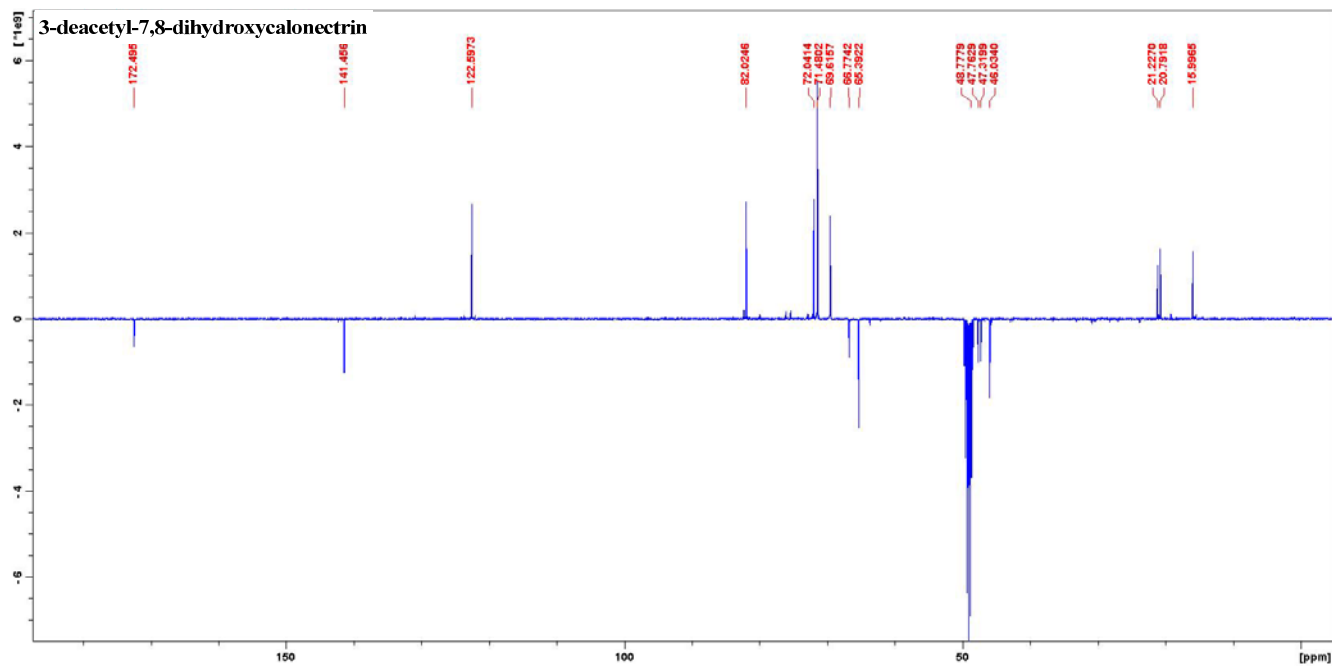

**Figure S20.** COSY (400 MHz, methanol- $d_4$ ) of 3-deacetyl-7,8-dihydroxycalonectrin (**8**).

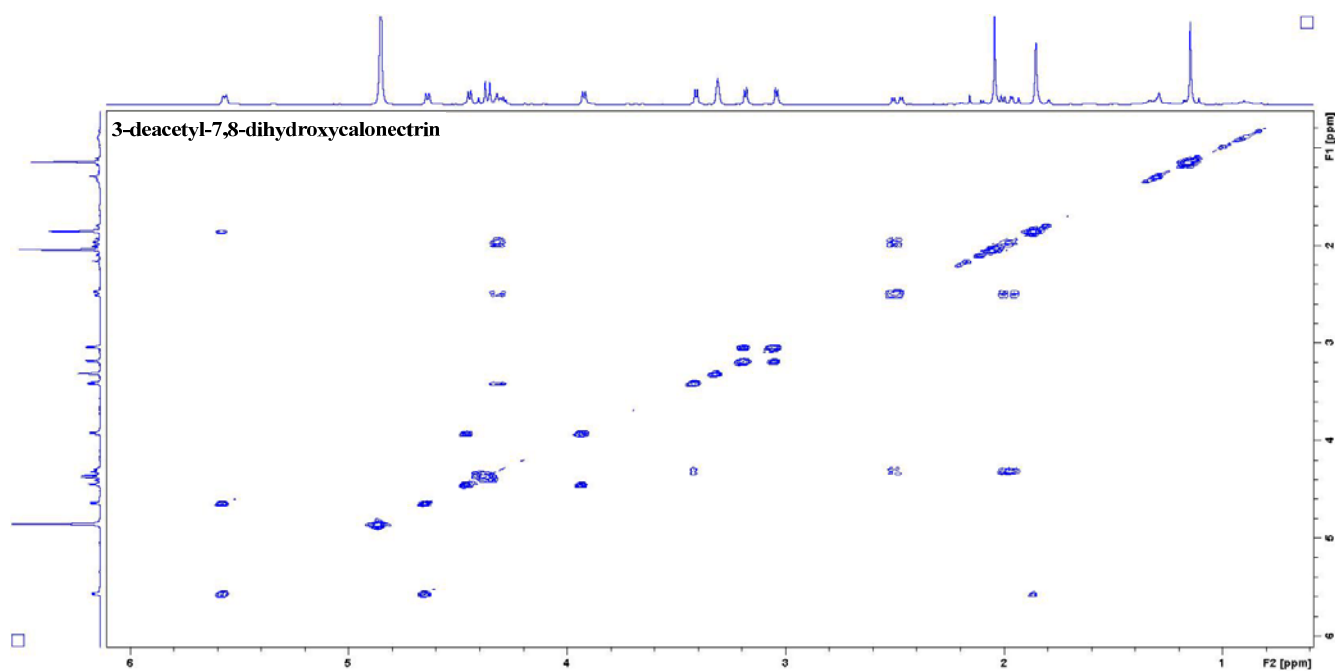

**Figure S21.** HSQC (400 MHz, methanol- $d_4$ ) of 3-deacetyl-7,8-dihydroxycalonectrin (**8**).

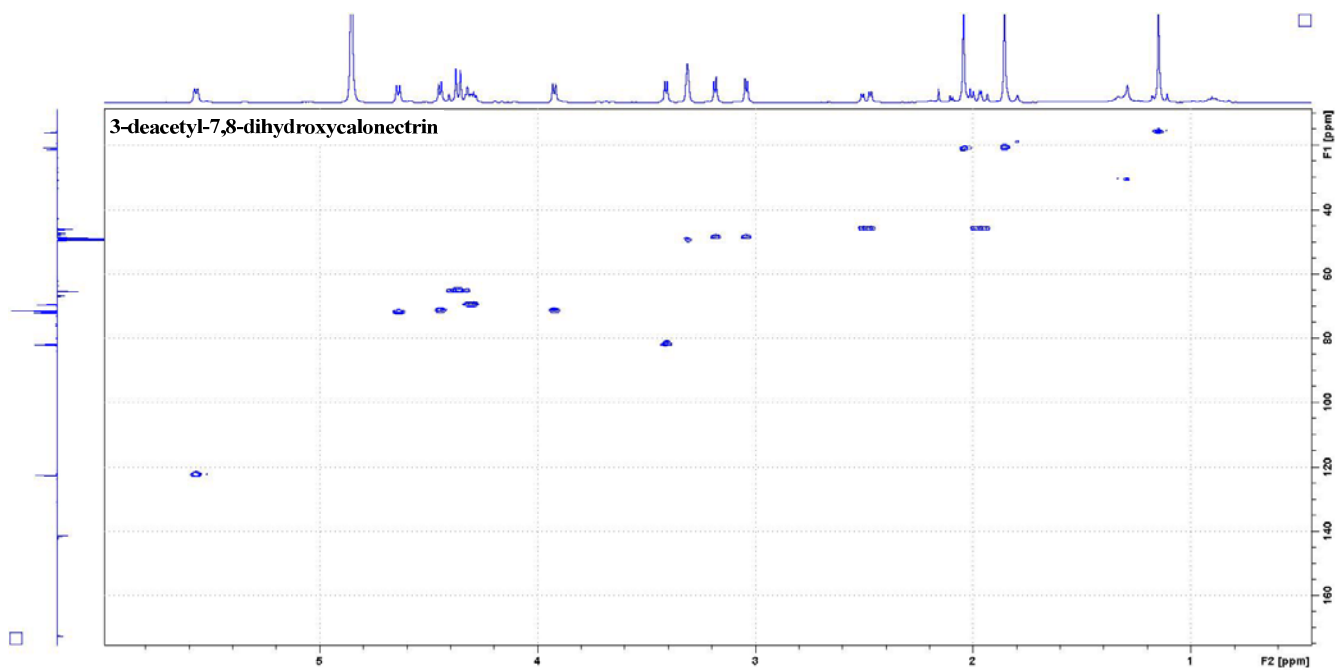

**Figure S22.** HMBC (400 MHz, methanol- $d_4$ ) of 3-deacetyl-7,8-dihydroxycalonectrin (**8**).

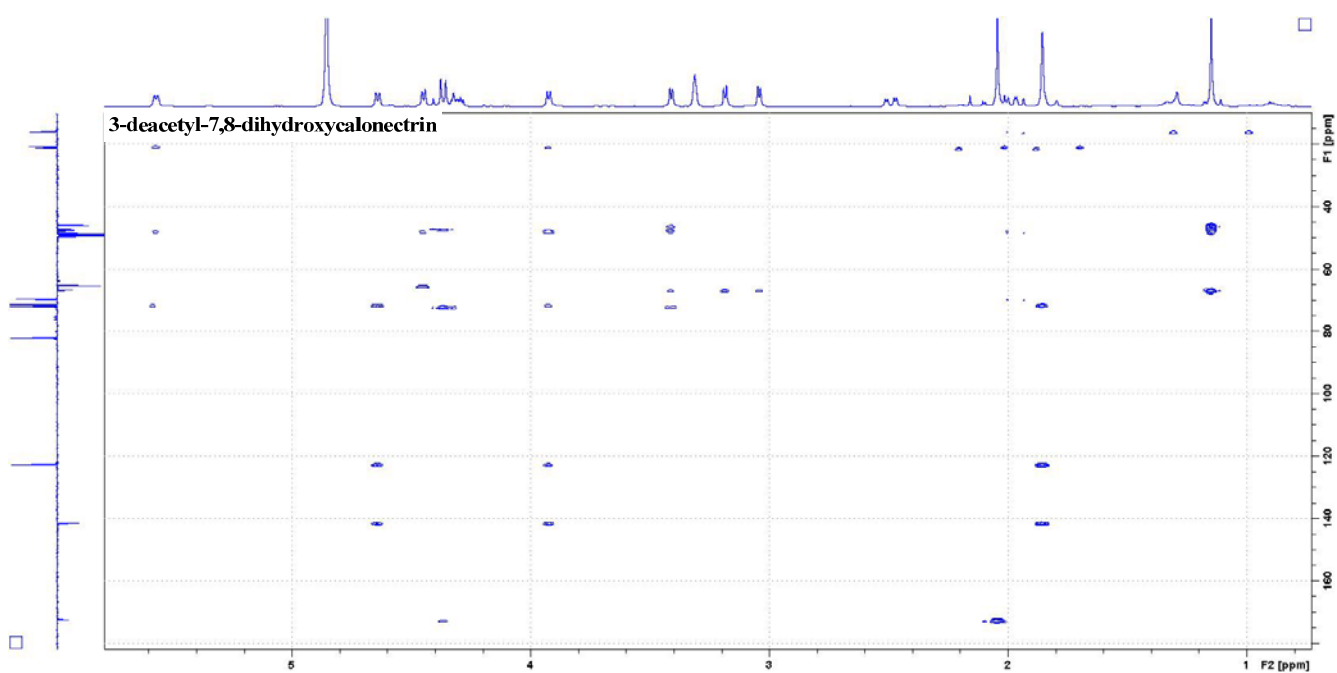

Figure S23.  $^1\text{H}$  (200 MHz, methanol- $d_4$ ) of 7,8-dihydroxycalonectrin (**9**).

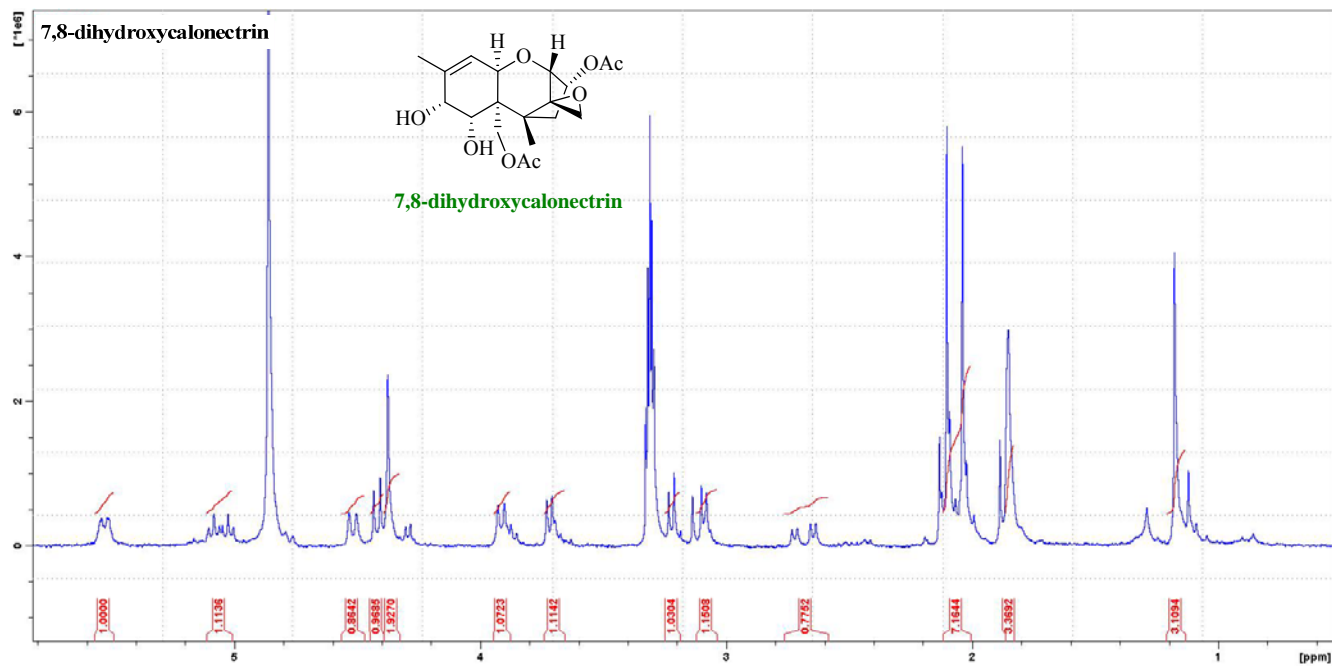

Figure S24.  $^{13}\text{C}$  (50 MHz, methanol- $d_4$ ) of 7,8-dihydroxycalonectrin (**9**).

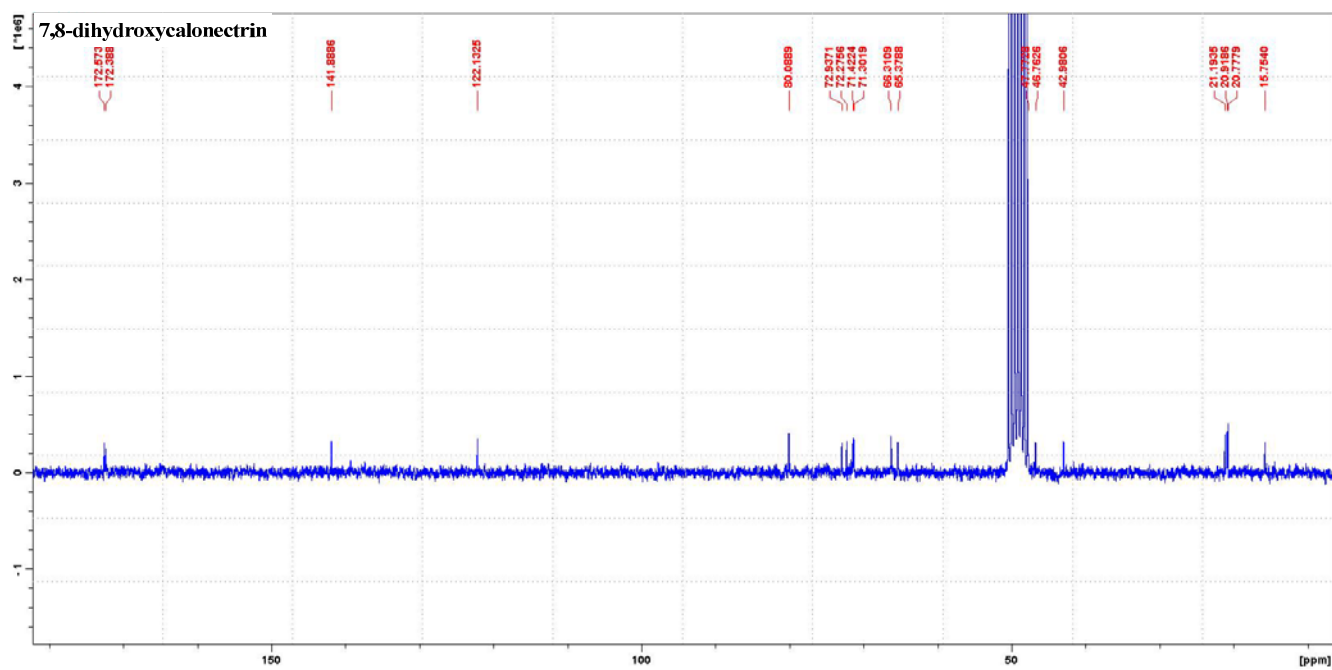

## 2. CD Spectra

**Figure S25.** CD spectra of Deoxynivalenol (**2**), 1 mmol in H<sub>2</sub>O.

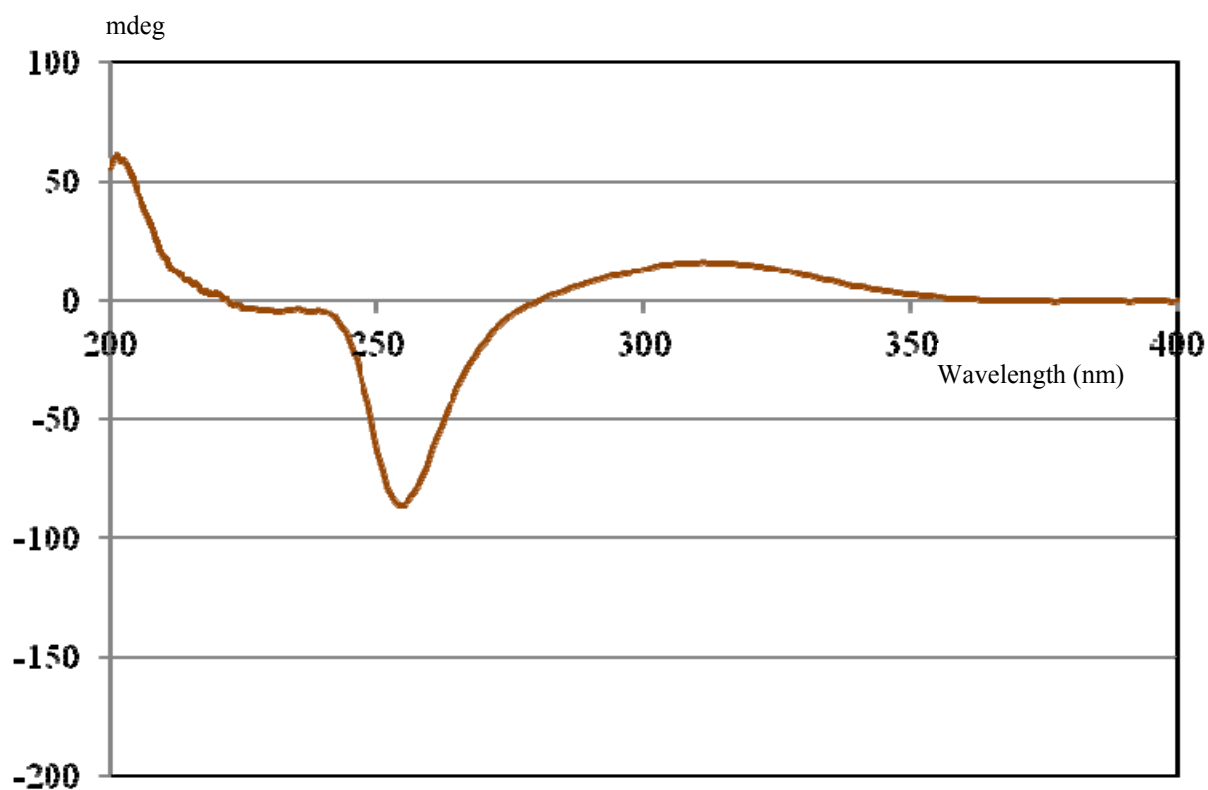

**Figure S26.** CD spectra of 3,7,8,15-Tetrahydroxyscirpene (**5**), 1 mmol in H<sub>2</sub>O.

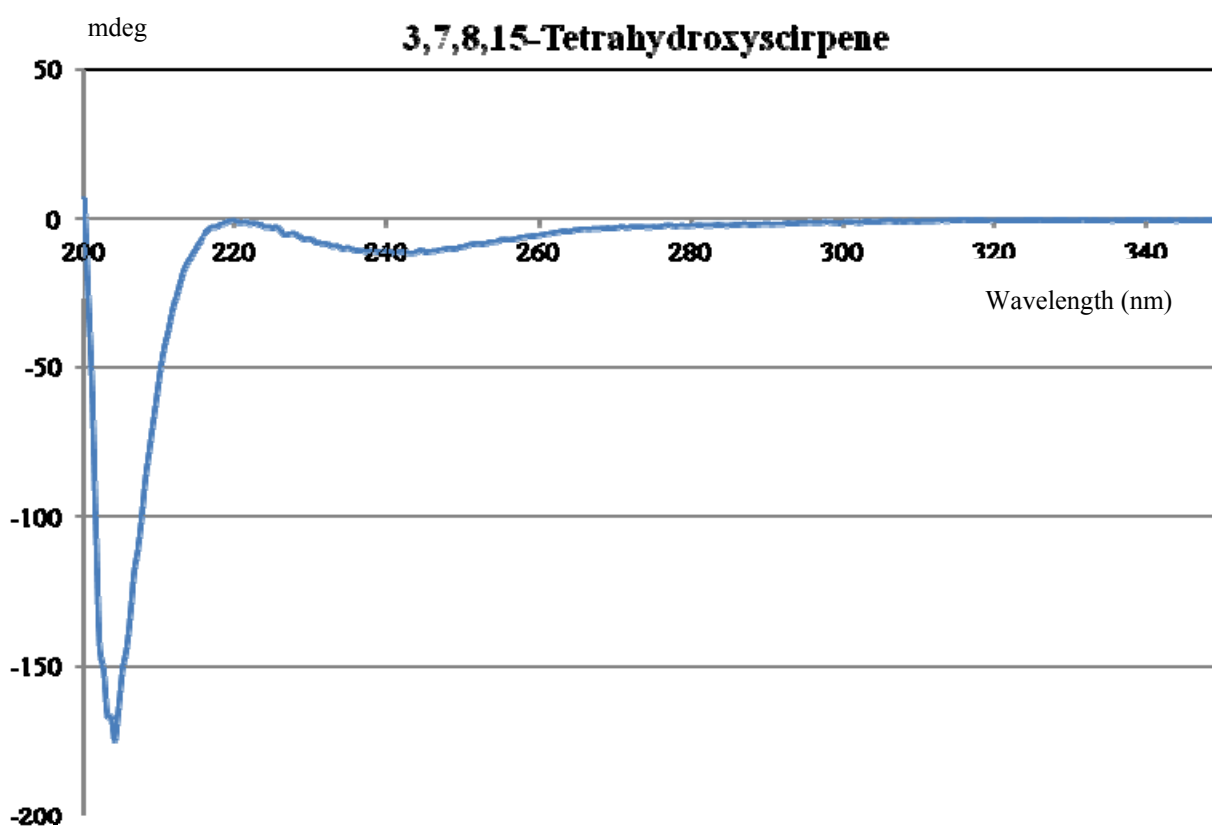

**Figure S27.** CD spectra of 15-Deacetyl-7,8-dihydroxycalonectrin (**7**), 1 mmol in H<sub>2</sub>O.

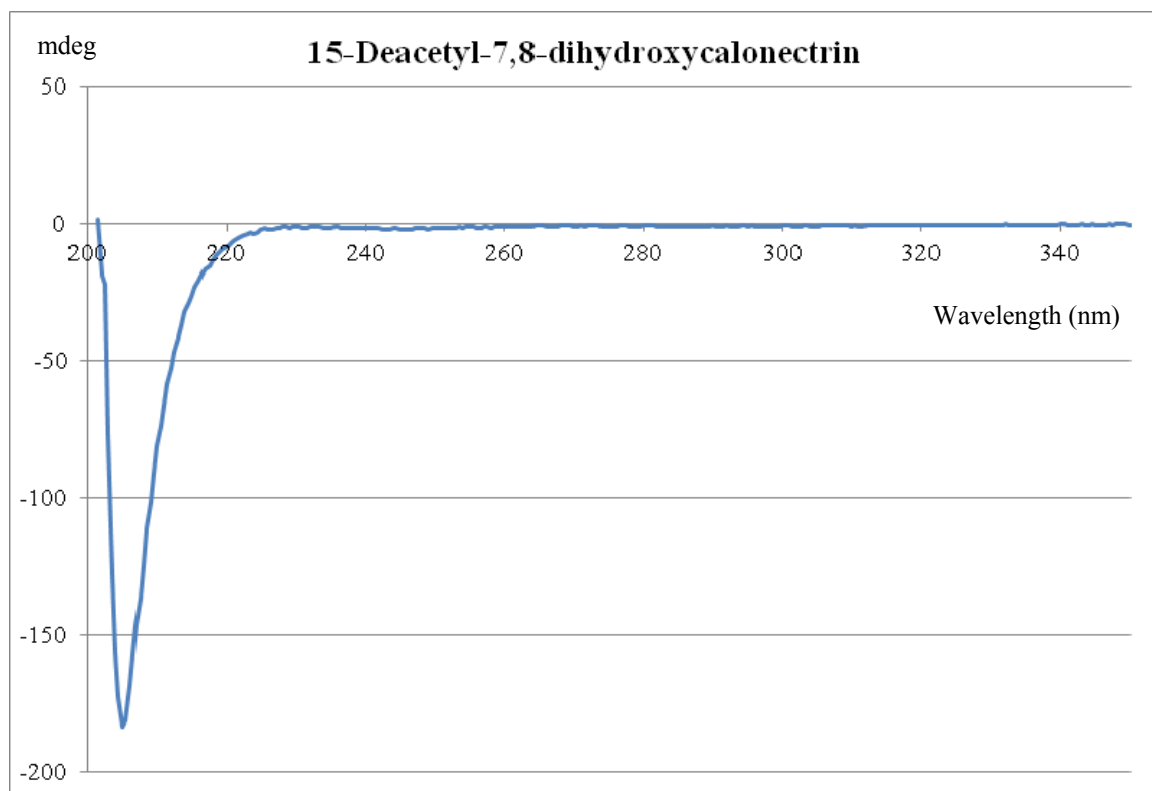

**Figure S28.** CD spectra of 3-Deacetyl-7,8-dihydroxycalonectrin (**8**), 1 mmol in H<sub>2</sub>O.

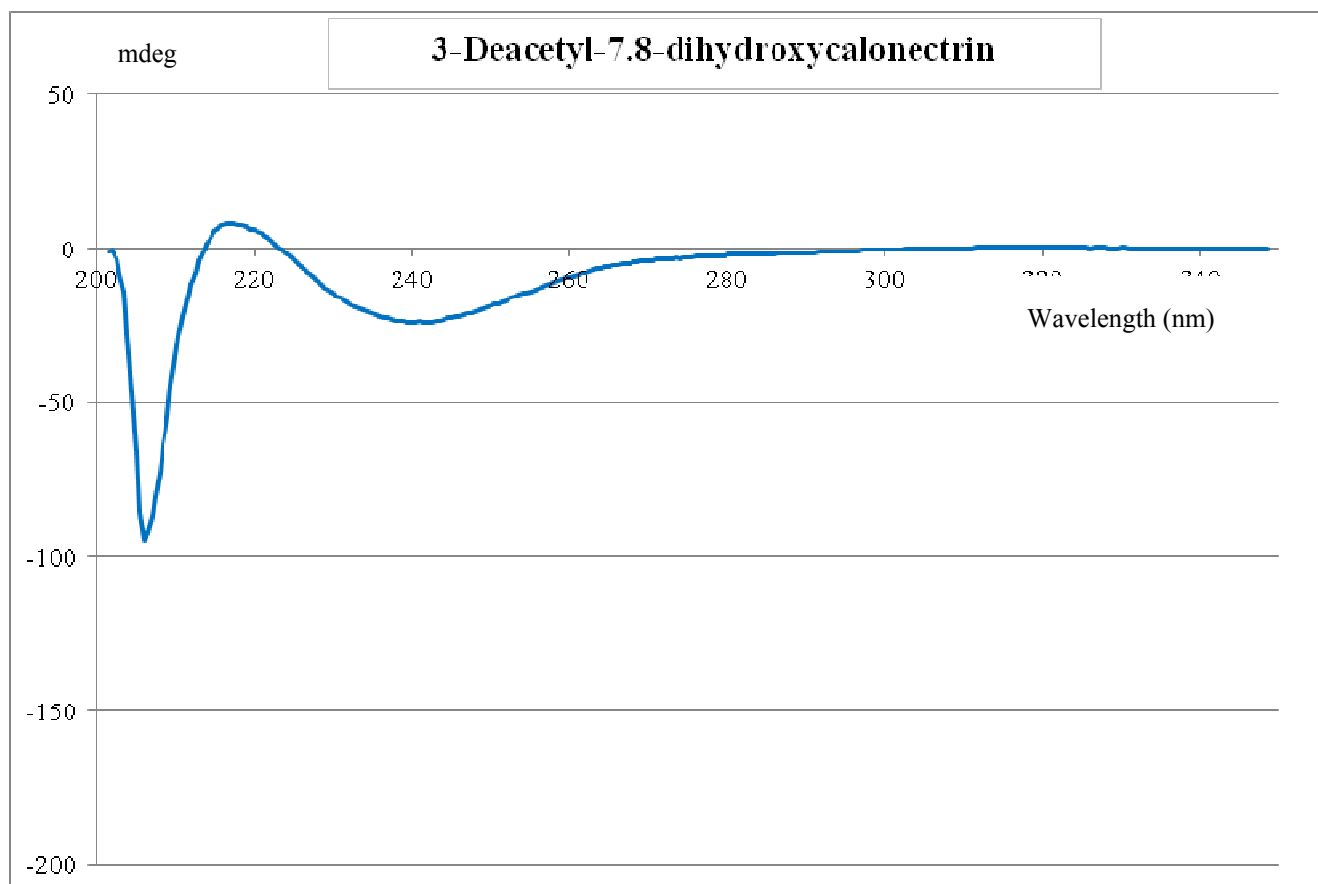

**Figure S29.** CD spectra of 7,8-dihydroxycalonectrin (**9**), 1 mmol in H<sub>2</sub>O.

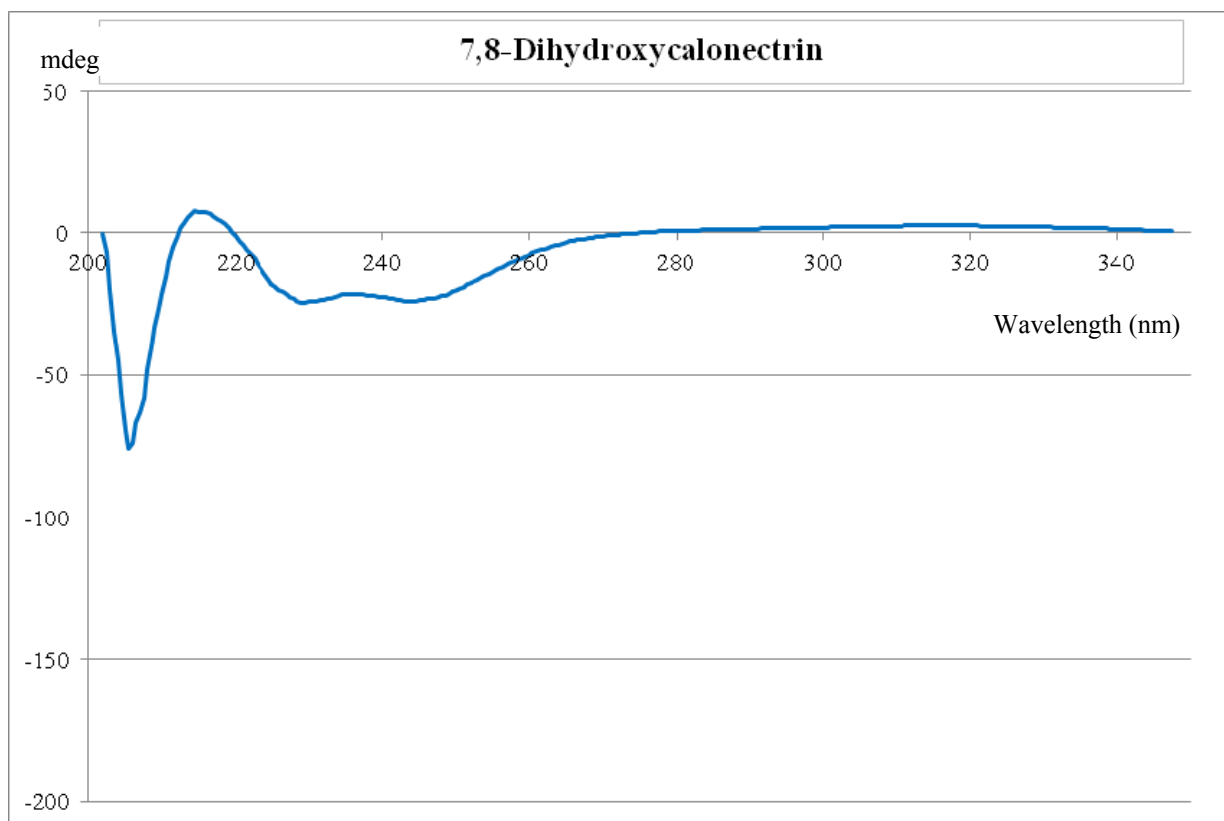

### 3. Quantum Chemical Calculations

On the basis of the observed NOESY correlations a reasonable starting geometry of **5** was optimized (geometry optimization to energy minimum as well as subsequent frequency analysis) applying DFT calculations [1,2] at the level 6-311++G(d,p) [3], using the B3LYP hybrid functional [4], as implemented in the Gaussian 09 (Revision A.1) program package [5]. Data analysis was done using GaussView 5 (Gaussian, Inc., Wallingford, CT, USA). The obtained geometry is shown in Figure S25 including selected NOESY correlations as indicated by dashed bonds. The determined H,H-distances for the selected NOESY correlations are summarized in Table S1.

**Figure S30.** Optimized geometry of **5** (selected NOESY correlations are indicated by dashed bonds).

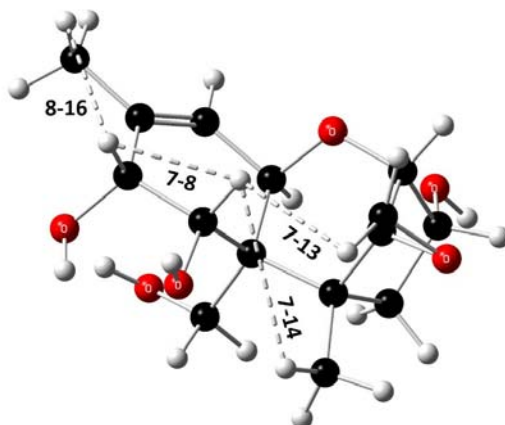

**Table S1.** Determined H,H-distances ( $r_{\text{HH}}$ , in Å) for selected NOESY correlations on the basis of the optimized geometry of **5** in gas phase.

| NOESY correlation | $r_{\text{HH}}$ ( <b>5</b> ) |
|-------------------|------------------------------|
| H7–H8             | 2.32                         |
| H7–H13            | 2.69                         |
| H7–H14            | 3.29                         |
| H8–H16            | 2.57                         |

**Table S2.** Optimized geometry for **5** in gas phase (DFT, 6-311++G(d,p), B3LYP).

| Nr. | Atom | Z-matrix |    |    |         |           |            | Cartesian coordinates |          |          |
|-----|------|----------|----|----|---------|-----------|------------|-----------------------|----------|----------|
|     |      | NA       | NB | NC | Bond    | Angle     | Dihedral   | X                     | Y        | Z        |
| 1   | C    |          |    |    |         |           |            | 2.60957               | 0.93565  | -0.77360 |
| 2   | C    | 1        |    |    | 1.50487 |           |            | 2.48377               | -0.56222 | -0.70144 |
| 3   | C    | 2        | 1  |    | 1.54324 | 114.02722 |            | 1.03425               | -1.06357 | -0.53077 |
| 4   | C    | 3        | 2  | 1  | 1.55203 | 114.53607 | -44.52659  | 0.20196               | -0.28298 | 0.52128  |
| 5   | C    | 4        | 3  | 2  | 1.60130 | 113.24874 | 174.16170  | -1.33530              | -0.72882 | 0.56839  |
| 6   | C    | 5        | 4  | 3  | 1.57383 | 110.14051 | -164.74757 | -2.18572              | 0.33978  | 1.35058  |
| 7   | C    | 6        | 5  | 4  | 1.55635 | 107.04738 | 88.94198   | -2.66054              | 1.39543  | 0.31021  |
| 8   | C    | 7        | 6  | 5  | 1.54093 | 103.97291 | -5.77396   | -1.94792              | 0.98136  | -0.99179 |
| 9   | C    | 4        | 3  | 2  | 1.56192 | 105.22625 | 56.89452   | 0.24761               | 1.20752  | 0.05664  |
| 10  | C    | 1        | 2  | 3  | 1.33142 | 119.91003 | 14.69751   | 1.58895               | 1.70621  | -0.40313 |
| 11  | C    | 8        | 7  | 6  | 1.51708 | 100.51706 | 33.90298   | -1.93356              | -0.52720 | -0.83189 |
| 12  | C    | 11       | 8  | 7  | 1.46136 | 124.83681 | 147.80617  | -2.01451              | -1.48422 | -1.93331 |
| 13  | C    | 1        | 10 | 9  | 1.50389 | 123.57680 | 179.40739  | 3.93320               | 1.47601  | -1.24016 |
| 14  | C    | 4        | 3  | 2  | 1.56325 | 112.18598 | -64.44281  | 0.77327               | -0.44855 | 1.96694  |
| 15  | C    | 5        | 4  | 3  | 1.53483 | 114.75570 | 70.14387   | -1.58087              | -2.12947 | 1.14593  |
| 16  | O    | 8        | 7  | 6  | 1.42110 | 113.99811 | -82.49657  | -0.60939              | 1.44817  | -1.09167 |
| 17  | O    | 2        | 1  | 10 | 1.44275 | 108.20024 | -109.75966 | 3.33159               | -1.03473 | 0.36602  |
| 18  | O    | 3        | 2  | 1  | 1.44558 | 107.22092 | -168.71583 | 1.10328               | -2.47155 | -0.21057 |
| 19  | O    | 7        | 6  | 5  | 1.42388 | 115.36349 | -126.84526 | -2.35864              | 2.74890  | 0.63334  |
| 20  | O    | 12       | 11 | 8  | 1.43810 | 59.64435  | -101.13525 | -3.17643              | -1.19131 | -1.13815 |
| 21  | O    | 14       | 4  | 3  | 1.41596 | 116.73478 | 80.54735   | 1.88059               | 0.36402  | 2.31120  |
| 22  | H    | 2        | 1  | 10 | 1.10182 | 108.76104 | 133.84972  | 2.86358               | -0.99540 | -1.64064 |
| 23  | H    | 3        | 2  | 1  | 1.09226 | 106.48716 | 74.46622   | 0.54691               | -0.93878 | -1.50028 |
| 24  | H    | 6        | 5  | 4  | 1.08978 | 113.21654 | -32.58852  | -1.63123              | 0.82684  | 2.15241  |
| 25  | H    | 7        | 6  | 5  | 1.09526 | 109.69558 | 108.54902  | -3.73668              | 1.28615  | 0.13826  |
| 26  | H    | 8        | 7  | 6  | 1.09006 | 113.20362 | 156.08476  | -2.45767              | 1.33008  | -1.89000 |
| 27  | H    | 9        | 4  | 3  | 1.09252 | 108.88526 | -165.60008 | -0.09428              | 1.84402  | 0.87615  |
| 28  | H    | 10       | 1  | 13 | 1.08596 | 119.89627 | 2.46129    | 1.67549               | 2.78683  | -0.46710 |
| 29  | H    | 12       | 11 | 8  | 1.08745 | 119.82552 | 156.47846  | -1.62569              | -2.49154 | -1.80424 |
| 30  | H    | 12       | 11 | 8  | 1.08785 | 119.70215 | 2.34656    | -2.05308              | -1.12364 | -2.95894 |



**Table S2. Cont.**

| Nr. | Atom | Z-matrix |    |    |         |           |            | Cartesian coordinates |          |          |
|-----|------|----------|----|----|---------|-----------|------------|-----------------------|----------|----------|
|     |      | NA       | NB | NC | Bond    | Angle     | Dihedral   | X                     | Y        | Z        |
| 31  | H    | 13       | 1  | 10 | 1.09622 | 110.94873 | -121.04216 | 4.16116               | 1.13166  | -2.25562 |
| 32  | H    | 13       | 1  | 10 | 1.09133 | 111.27095 | -0.44044   | 3.93752               | 2.56734  | -1.24013 |
| 33  | H    | 13       | 1  | 10 | 1.09441 | 110.76251 | 120.32235  | 4.74454               | 1.12577  | -0.59457 |
| 34  | H    | 14       | 4  | 3  | 1.08931 | 108.76775 | -161.13599 | -0.00270              | -0.18121 | 2.68318  |
| 35  | H    | 14       | 4  | 3  | 1.09518 | 108.31045 | -45.34996  | 1.00220               | -1.50747 | 2.12725  |
| 36  | H    | 15       | 5  | 4  | 1.09220 | 110.98074 | 67.36836   | -1.33830              | -2.16162 | 2.21037  |
| 37  | H    | 15       | 5  | 4  | 1.09201 | 108.95594 | -174.23921 | -2.63922              | -2.37652 | 1.03947  |
| 38  | H    | 15       | 5  | 4  | 1.08777 | 112.48858 | -53.26508  | -0.98718              | -2.89407 | 0.64977  |
| 39  | H    | 17       | 2  | 1  | 0.96784 | 106.25624 | 169.55318  | 3.10603               | -1.96649 | 0.49891  |
| 40  | H    | 18       | 3  | 2  | 0.96289 | 108.45933 | -80.84470  | 1.22914               | -2.96434 | -1.02818 |
| 41  | H    | 19       | 7  | 6  | 0.96198 | 108.59281 | -75.02484  | -2.95981              | 3.04043  | 1.32545  |
| 42  | H    | 21       | 14 | 4  | 0.96949 | 107.35043 | -71.65088  | 2.64948               | 0.02483  | 1.82781  |
| 43  | H    | 6        | 5  | 4  | 1.09230 | 108.68967 | -151.71110 | -3.04324              | -0.16055 | 1.80605  |

## References

1. Kohn, W.; Sham, L.J. Self-consistent equations including exchange and correlation effects. *Phys. Rev.* **1965**, *140*, A1133–A1138.
2. Parr, R.G.; Yang, W. *Density Functional Theory of Atoms and Molecules*. Oxford University Press: London, UK, 1989.
3. Krishnan, R.; Binkley, J.S.; Seeger, R.; Pople, J.A. Self consistent molecular orbital methods. XX. A basis set for correlated wave functions. *J. Chem. Phys.* **1980**, *72*, 650–654.
4. Becke, A.D. Density-functional thermochemistry. III. The role of exact exchange. *J. Chem. Phys.* **1993**, *98*, 5648–5652.
5. Frisch, M.J.; Trucks, G.W.; Schlegel, H.B.; Scuseria, G.E.; Robb, M.A.; Cheeseman, J.R.; Scalmani, G.; Barone, V.; Mennucci, B.; Petersson, G.A.; *et al.* *Gaussian 09, Revision A.1*. Gaussian Inc: Wallingford, CT, USA, 2009.

© 2014 by the authors; licensee MDPI, Basel, Switzerland. This article is an open access article distributed under the terms and conditions of the Creative Commons Attribution license (<http://creativecommons.org/licenses/by/3.0/>).
